# Supplementary material for: Association of fish oil supplementation with risk of incident severe non-alcoholic fatty liver disease: a prospective study of 488 888 individuals
Source: Royal Society of Chemistry journal article supplement (doi:10.1039/d5fo02448j), 2026-01-01
Supplement: d5fo02448j1.pdf [file d5fo02448j1.pdf]

## Supplementary material

### Content

|                                                                                                                                                                      |   |
|----------------------------------------------------------------------------------------------------------------------------------------------------------------------|---|
| Supplementary Figure 1 The flow chart of the analysis. ....                                                                                                          | 2 |
| Supplementary Figure 2 Subgroup analyses for the association between fish oil supplementation and the risk of severe NAFLD stratified by potential risk factors..... | 3 |
| Supplemental Table 1 Spearman correlations between fish oil supplement use assessed at baseline and in follow-up surveys. ....                                       | 4 |
| Supplementary Table 2 Single-nucleotide polymorphisms associated with circulating individual n-3 PUFA. ....                                                          | 5 |
| Supplementary Table 3 Mediating effects of biomarkers on the association of fish oil supplementation with risk of severe NAFLD in the UK Biobank study. ....         | 6 |
| Supplementary Table 4 Interactions between fish oil and both the number of n-3 PUFA-associated alleles and individual n-3 PUFA-associated SNPs for NAFLD.....        | 7 |
| Supplementary Table 5 Sensitivity analyses for the HRs (95% CIs) of severe NAFLD according to fish oil supplement use. ....                                          | 8 |

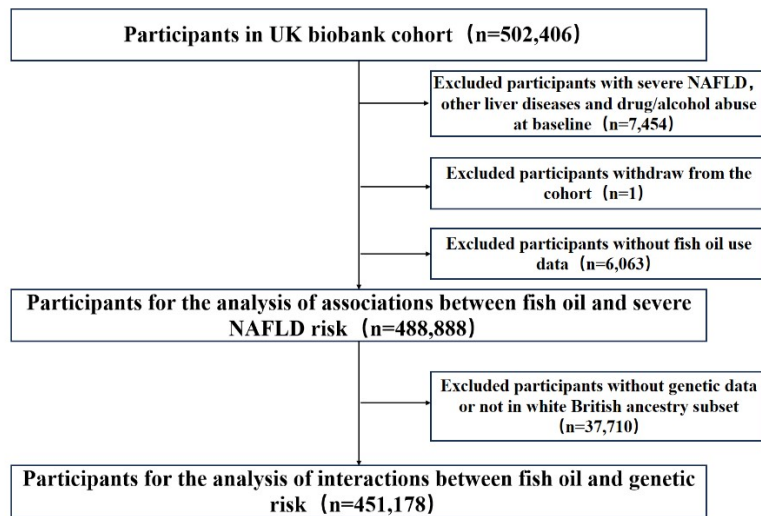

**Supplementary Figure 1 The flow chart of the analysis.**

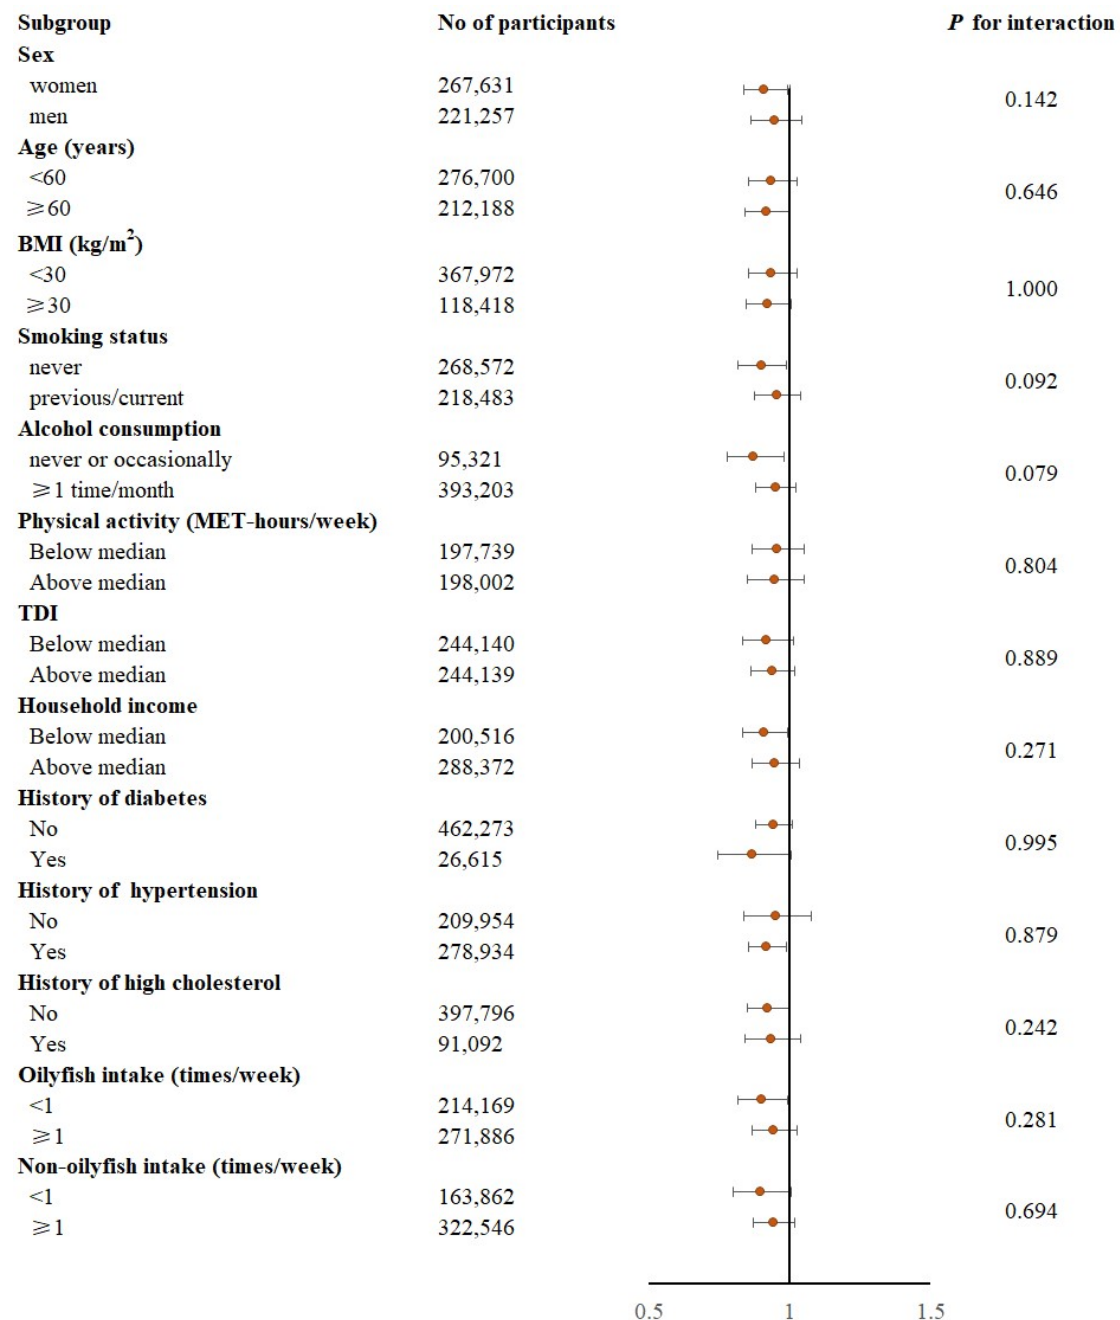

**Supplementary Figure 2 Subgroup analyses for the association between fish oil supplementation and the risk of severe NAFLD stratified by potential risk factors.** HR, hazard ratio; CI, confidence interval; BMI, body mass index; MET, metabolic equivalent of task; TDI, Townsend deprivation index. Forest plots show the multivariable HRs of severe NAFLD associated with fish oil use in subgroups. HRs were adjusted for age, sex, race, assessment centers, education, TDI, household income, smoking status, alcohol consumption, physical activity, aspirin use, vitamin supplementation use, mineral supplementation use, BMI, history of hypertension, history of cardiovascular disease, history of high cholesterol, history of diabetes, history of cancer, and healthy diet score.

**Supplemental Table 1 Spearman correlations between fish oil supplement use assessed at baseline and in follow-up surveys.**

| <input type="checkbox"/>                         | <b>Baseline</b> | <b>First repeat assessment<br/>(2012-2013)</b> | <b>Second repeat assessment<br/>(2014 and later)</b> |
|--------------------------------------------------|-----------------|------------------------------------------------|------------------------------------------------------|
| <b>No. of participants</b>                       | 488,888         | 19,637                                         | 54,322                                               |
| <b>Baseline</b>                                  | 1.00            | 0.61                                           | 0.46                                                 |
| <b>First repeat assessment (2012-2013)</b>       |                 | 1.00                                           | 0.61                                                 |
| <b>Second repeat assessment (2014 and later)</b> |                 |                                                | 1.00                                                 |

The Spearman method was used to calculate correlation coefficients among baseline fish oil supplement use and two repeated assessments ( 2012 to 2013 and 2014 and later ) fish oil supplement use.

**Supplementary Table 2 Single-nucleotide polymorphisms associated with circulating individual n-3 PUFA.**

| FA         | SNP       | Nearby Gene    | Chr | EA | NEA | % Variance Explained | Association with FA Levels |       |                        |
|------------|-----------|----------------|-----|----|-----|----------------------|----------------------------|-------|------------------------|
|            |           |                |     |    |     |                      | Beta *                     | SE    | P                      |
| <b>ALA</b> | rs174547  | FADS1          | 11  | C  | T   | 1                    | 0.02                       | 0.001 | $3.5 \times 10^{-64}$  |
| <b>EPA</b> | rs3798713 | ELOVL2         | 6   | C  | G   | 0.4                  | 0.04                       | 0.005 | $1.9 \times 10^{-12}$  |
|            | rs174538  | FADS1/C11orf10 | 11  | G  | A   | 0.7                  | 0.08                       | 0.005 | $5.4 \times 10^{-58}$  |
|            | rs780094  | GCKR           | 2   | T  | C   | 0.5                  | 0.02                       | 0.003 | $9.0 \times 10^{-9}$   |
| <b>DPA</b> | rs3734398 | ELOVL2         | 6   | C  | T   | 2.7                  | 0.04                       | 0.003 | $9.7 \times 10^{-43}$  |
|            | rs174547  | FADS1          | 11  | T  | C   | 8.4                  | 0.08                       | 0.003 | $3.8 \times 10^{-154}$ |
| <b>DHA</b> | rs2236212 | ELOVL2         | 6   | G  | C   | 0.7                  | 0.11                       | 0.014 | $1.3 \times 10^{-15}$  |

FA, fatty acid; SNP, single-nucleotide polymorphisms; Chr, chromosome; EA, effect allele; NEA, none-effect allele; SE, standard error; ALA,  $\alpha$ -linolenic acid; EPA, eicosapentaenoic acid; DPA, docosapentaenoic acid; DHA, docosahexaenoic acid. \* The beta coefficients represent the change in percentage of total plasma fatty acid levels for each additional effect allele.

**Supplementary Table 3 Mediating effects of biomarkers on the association of fish oil supplementation with risk of severe NAFLD in the UK Biobank study.**

| <b>Mediators</b>     | <b>n</b> | <b>Total</b>     | <b>Direct</b>    | <b>Proportion mediated</b> | <b>P value</b> |
|----------------------|----------|------------------|------------------|----------------------------|----------------|
| <b>CRP*</b>          | 459,847  | 0.92 (0.86-0.98) | 0.93 (0.87-0.99) | 8.8% (3.6%-20.0%)          | <0.001         |
| <b>TG</b>            | 460,475  | 0.92 (0.87-0.99) | 0.92 (0.86-0.98) | /                          | /              |
| <b>TC</b>            | 460,835  | 0.93 (0.87-0.99) | 0.93 (0.87-0.99) | /                          | /              |
| <b>HDL-C</b>         | 421,844  | 0.93 (0.87-1.00) | 0.94 (0.87-1.00) | 7.5% (2.7%-19.6%)          | <0.001         |
| <b>Blood glucose</b> | 421,536  | 0.93 (0.87-0.99) | 0.93 (0.87-0.99) | /                          | /              |
| <b>LDL-C</b>         | 459,975  | 0.93 (0.87-0.99) | 0.92 (0.87-0.99) | /                          | /              |
| <b>HbA1c</b>         | 457,831  | 0.94 (0.88-1.00) | 0.94 (0.88-1.00) | 2.2% (0.6%-8.3%)           | 0.015          |
| <b>Cystatin C</b>    | 460,805  | 0.93 (0.87-0.99) | 0.93 (0.88-1.00) | 10.0% (3.8%-23.7%)         | <0.001         |
| <b>Creatinine</b>    | 460,604  | 0.93 (0.87-0.99) | 0.92 (0.87-0.99) | /                          | /              |
| <b>ApoA</b>          | 419,557  | 0.93 (0.87-0.99) | 0.93 (0.87-0.99) | 3.0% (1.0%-8.5%)           | <0.001         |
| <b>ApoB</b>          | 458,521  | 0.92 (0.86-0.98) | 0.92 (0.86-0.98) | /                          | /              |

CRP, C-reactive protein; TG, triglyceride; TC, total cholesterol; HDL-C, high-density lipoprotein cholesterol; LDL-C, low-density lipoprotein cholesterol; HbA1c, glycosylated hemoglobin; ApoA, apolipoprotein A; ApoB, apolipoprotein B

\*CRP was log transformed due to right distribution.

**Supplementary Table 4 Interactions between fish oil and both the number of n-3 PUFA-associated alleles and individual n-3 PUFA-associated SNPs for NAFLD.**

|                                                 | Number of alleles/SNP |       |          | fish oil |       |          | Number of alleles/SNP×fish oil |       |          |
|-------------------------------------------------|-----------------------|-------|----------|----------|-------|----------|--------------------------------|-------|----------|
|                                                 | $\beta$               | SE    | <i>P</i> | $\beta$  | SE    | <i>P</i> | $\beta$                        | SE    | <i>P</i> |
| <b>N-3 PUFA -associated alleles<sup>a</sup></b> | 0.022                 | 0.014 | 0.107    | -0.031   | 0.185 | 0.866    | -0.006                         | 0.026 | 0.831    |
| <b>EPA-associated alleles<sup>b</sup></b>       | -0.023                | 0.017 | 0.172    | -0.083   | 0.078 | 0.288    | 0.006                          | 0.032 | 0.854    |
| <b>DPA-associated alleles<sup>c</sup></b>       | 0.021                 | 0.014 | 0.126    | -0.082   | 0.083 | 0.323    | 0.004                          | 0.026 | 0.873    |
| <b>DHA-associated allele<sup>d</sup></b>        | 0.004                 | 0.024 | 0.860    | -0.038   | 0.061 | 0.527    | -0.028                         | 0.044 | 0.529    |
| <b>rs174547_C</b>                               | 0.046                 | 0.024 | 0.057    | -0.062   | 0.047 | 0.186    | -0.012                         | 0.046 | 0.790    |
| <b>rs3798713_C</b>                              | -0.002                | 0.024 | 0.928    | -0.087   | 0.051 | 0.087    | 0.019                          | 0.044 | 0.667    |
| <b>rs174538_G</b>                               | -0.047                | 0.025 | 0.057    | -0.058   | 0.071 | 0.416    | -0.009                         | 0.046 | 0.844    |
| <b>rs780094_T</b>                               | 0.112                 | 0.024 | <0.001   | -0.047   | 0.049 | 0.343    | -0.028                         | 0.044 | 0.521    |
| <b>rs3734398_C</b>                              | -0.004                | 0.024 | 0.850    | -0.094   | 0.051 | 0.062    | 0.028                          | 0.044 | 0.525    |

<sup>a</sup> n-3 PUFA-associated allele: rs174547\_C+rs3798713\_C+rs174538\_G+rs780094\_T+rs3734398\_C+rs174547\_T+rs2236212\_G.

<sup>b</sup> EPA-associated alleles: rs3798713\_C+rs174538\_G.

<sup>c</sup> DPA-associated alleles: rs780094\_T+rs3734398\_C+rs174547\_T.

<sup>d</sup> DHA-associated allele: rs2236212\_G

**Supplementary Table 5 Sensitivity analyses for the HRs (95% CIs) of severe NAFLD according to fish oil supplement use.**

|                                                                                       | <b>Fish oil non-users</b> | <b>Fish oil users</b> | <b><i>P</i> values</b> |
|---------------------------------------------------------------------------------------|---------------------------|-----------------------|------------------------|
| <b>Further adjusting for oily fish and non-oily fish intake</b>                       |                           |                       |                        |
| Number of participants                                                                | 334,991                   | 153,897               |                        |
| Number of case (%)                                                                    | 4,030 (1.2)               | 1,641 (1.1)           |                        |
| Multivariable-adjusted HR (95% CI)                                                    | 1[Reference]              | 0.93 (0.87-0.99)      | 0.022                  |
| <b>Further adjusting for lipid-lowering medicine</b>                                  |                           |                       |                        |
| Number of participants                                                                | 334,991                   | 153,897               |                        |
| Number of case (%)                                                                    | 4,030 (1.2)               | 1,641 (1.1)           |                        |
| Multivariable-adjusted HR (95% CI)                                                    | 1[Reference]              | 0.93 (0.87-0.99)      | 0.020                  |
| <b>Further adjusting for anti-hypertension medicine</b>                               |                           |                       |                        |
| Number of participants                                                                | 334,991                   | 153,897               |                        |
| Number of case (%)                                                                    | 4,030 (1.2)               | 1,641 (1.1)           |                        |
| Multivariable-adjusted HR (95% CI)                                                    | 1[Reference]              | 0.93 (0.87-0.99)      | 0.021                  |
| <b>Excluding case within first 2 years</b>                                            |                           |                       |                        |
| Number of participants                                                                | 334,791                   | 153,814               |                        |
| Number of case (%)                                                                    | 3,330 (1.1)               | 1,558 (1.0)           |                        |
| Multivariable-adjusted HR (95% CI)                                                    | 1[Reference]              | 0.92 (0.87-0.99)      | 0.017                  |
| <b>Excluding participants with extreme BMI (&lt;18.5 or &gt;40, kg/m<sup>2</sup>)</b> |                           |                       |                        |
| Number of participants                                                                | 326,194                   | 150,880               |                        |
| Number of case (%)                                                                    | 3,671 (1.1)               | 1,532 (1.0)           |                        |
| Multivariable-adjusted HR (95% CI)                                                    | 1[Reference]              | 0.93 (0.87-0.99)      | 0.031                  |
| <b>Further adjusting for other major food groups</b>                                  |                           |                       |                        |
| Number of participants                                                                | 334,991                   | 153,897               |                        |
| Number of case (%)                                                                    | 4,030 (1.2)               | 1,641 (1.1)           |                        |

|                                    |              |                  |       |
|------------------------------------|--------------|------------------|-------|
| Multivariable-adjusted HR (95% CI) | 1[Reference] | 0.93 (0.88-0.99) | 0.030 |
|------------------------------------|--------------|------------------|-------|

---

HR, hazard ratio; CI, confidence interval.

HR were estimated from Cox proportional hazards models adjusted for age, sex, race (White, non-White, or other ethnic group), assessment centers (22 categories), education (college or university degree, vocational qualifications, optional national exams at ages 17–18 years, national exams at age 16 years, others, or missing), Townsend deprivation index (quartiles), household income (<£18,000, £18,000–£30,999, £31,000–£51,999, £52,000–£100,000, >£100,000, or missing), smoking status (never, former, current, or missing), alcohol consumption (never, special occasions only, 1–3 times/month, 1 or 2 times/week, 3 or 4 times/week, or daily/almost daily), physical activity (in MET-h/week; quartiles), aspirin use (yes, no), vitamin use (yes, no), mineral use (yes, no), BMI (in kg/m<sup>2</sup>; <18.5, 18.5 to 25, 25 to 30, 30 to 35, ≥35, or missing), history of hypertension (yes, no), history of cardiovascular disease (yes, no), history of high cholesterol (yes, no), history of diabetes (yes, no) and history of cancer (yes, no), healthy diet score (quintiles).
